# Supplementary figures and images for: Combined Tripier and V-Y Advancement Flaps for Reconstruction of Large Lid-cheek Junction Defects
Source: PubMed Central journal article supplement — Plast Reconstr Surg Glob Open. 2023 Mar 3;11(3):e4874. doi: 10.1097/GOX.0000000000004874 (PMC9984149; doi:10.1097/gox.0000000000004874), 2023-03-03

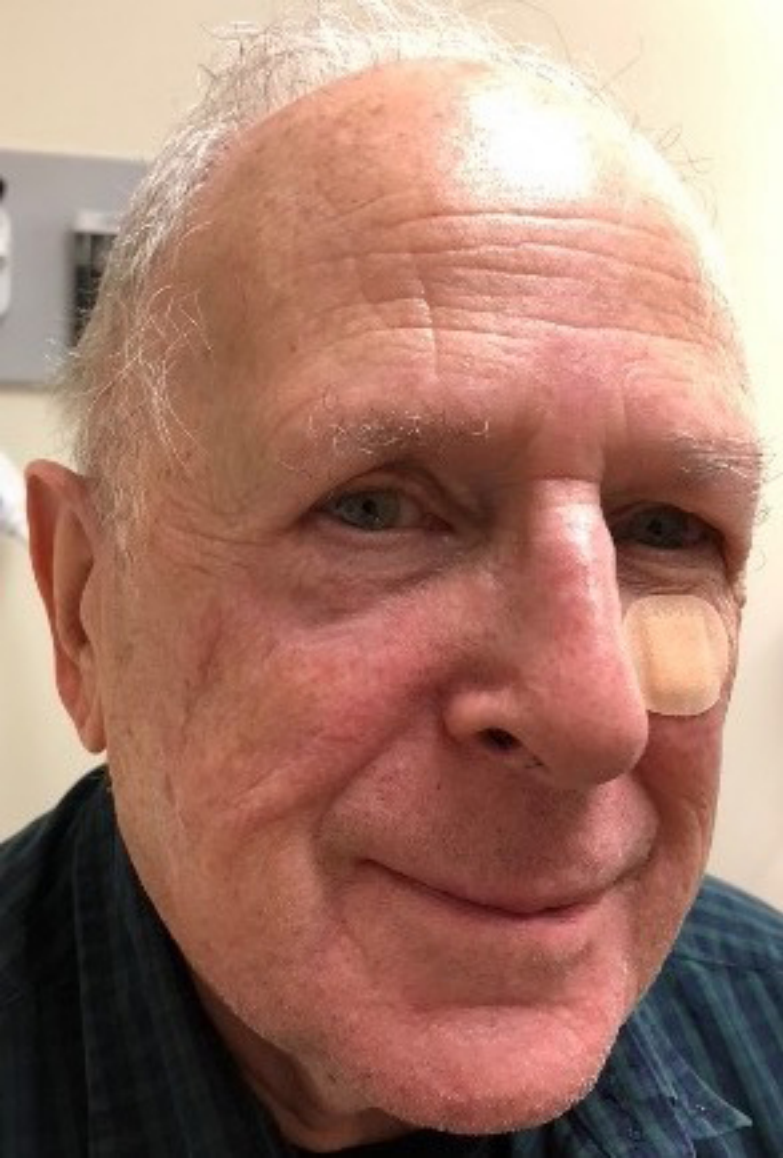

Supplement: gox-11-e4874-s002.pdf [file gox-11-e4874-s002.pdf]
